# Supplementary material for: Floods in the Pyrenees: A global view through a regional database
Source: Copernicus journal article supplement (doi:10.5194/nhess-2023-206), 2024-01-08
Supplement: Supplementary file [file nhess-2023-206-AC2-supplement.pdf]

## **Floods in the Pyrenees: A global view through a regional database**

María Carmen Llasat<sup>1,2</sup>, Montserrat Llasat-Botija<sup>1,2</sup>, Erika Pardo<sup>1,2</sup>, Raül Marcos-Matamoros<sup>1</sup>, Marc Lemus-Canovas<sup>3,4</sup>

### **Answers to Review 2**

This paper presents a detailed inventory of floods having caused significant damages and/or disruptions in the Pyrenean mountains for the 1981 – 2015 period, and proposes some analyses in terms of frequency, geographical distribution, temporal distribution, trends, and weather types related to these flood events. The presented database is rich (181 events, coverage of the whole Pyrenean region, information combining intensity of damages, victims, and compensation costs) and brings interesting information about the occurrence of floods in the considered region.

However, I think this paper should be significantly improved on the following aspects (see also my detailed comments hereafter):

Dear reviewer,

Above all, we want to express our acknowledgement for the time spent reviewing this paper. We have carefully considered all your comments, as well as those from the other reviewer, and have implemented substantial revisions to the paper. We are confident that these changes have significantly enhanced the quality of our work. Since at this stage of the review process we cannot yet attach the new version of the article, we have chosen to introduce those paragraphs, figures and tables that have been significantly modified or that are new.

We would like to thank you again for your helpful feedback and availability to review this paper.

Maria Carmen Llasat on behalf of all the authors

1. Some possible limits affecting the comprehensiveness of the inventory should be better stated and discussed. Particularly, obtaining a very low number of ordinary events in some specific regions is certainly caused by some limits in the inventory, provided that the sources of information involved are different for each region. For this reason, I think that most of the proposed analyses should rather focus on extraordinary and catastrophic events, than on the total number of events

Indeed, it is not possible to have information with the same detail for all regions. To make this clearer, in the new version we have modified section 2.2, which is now as follows. However, we cannot ignore the information obtained for all regions also considering the ordinary episodes, since they are not easy to find. That is why the category of notable events has been introduced, which includes catastrophic and extraordinary events.

Both in response to your comments and those of the other reviewer, the section dedicated to the description of the sources of information has been considerably improved, the partial

figures of the regions have been eliminated and two new figures have been constructed that show the flooding throughout the Pyrenees massif, both total and notable, in which the scales are the same and where the regional limits have been marked. A table has also been introduced in section 2.1 that includes for each region or autonomous community: the country, the number of municipalities that are part of the Pyrenees, the total population of those municipalities, the area they cover, the average GDP of the community, and the sources of information consulted.

Below is the new text of the section, as well as the table and both figures:

## 2.2 Sources of information and identification of flood events

Table 1 shows the main physical and socioeconomic characteristics of the study area as well as the sources of information used to identify all the flood events that have affected the Pyrenean Region. FLOODHYMEX (Llasat et al, 2013) was used to recover the catastrophic events that have affected the Pyrenees in Catalonia and the part of Occitanie corresponding to the Languedoc-Roussillon. For the Spanish part of the Pyrenees, the National Catalogue of Historical Floods (Catálogo Nacional de Inundaciones Históricas - CNIH) and the information from the Spanish Insurance Compensation Consortium (CCS, 2021) were also used. The CNIH catalogue was published by the General Directorate of Civil Protection in Spain and contains the most important flood events (DGPC, 2022). It is made up of reports made for the different river demarcations into which Spain is divided, observing some heterogeneities, such as the fact that the same event can be in two reports associated with different dates, which requires careful contrast with other sources. The CCS provided for the period 1996-2015 the compensation paid to municipalities in the Pyrenees, organized by postal code and date of the “claim”, which may be different from the date of the flood. In order to resolve this, the postcode data was transformed to a municipality data (a municipality may have more than one postcode) and the damage caused by a flood event was considered to be the sum of the compensations due to floods between the initial day of the event and the final day, with an additional 7 days, as in Cortès et al. (2019). Data from CCS has been also useful to identify some minor flood events that haven’t been found in the other sources of information. Finally, in the case of Catalonia, Aragón and Navarra, the information was completed based on news from the La Vanguardia, El Heraldo de Aragón and Diario de Navarra, newspapers, respectively. La Vanguardia had already been systematically consulted, day by day, for the construction of the INUNGAMA database (Llasat et al, 2014), part of which was included in FLOODHYMEX (Llasat et al., 2013) and PIRAGUA\_flood. Given that day-to-day consultation of newspapers is extremely slow, in the case of Aragon and Navarra only the cases identified from the rest of the sources cited above were consulted plus the government press releases and the days of rain that exceeded 40 mm (threshold fixed following the criteria of Cortès et al., 2019). This information was obtained from the precipitation field provided by the SAFRAN analysis (Quintana-Seguí et al., 2016). In the case of the Basque Country and Andorra, the project partners, through whom we obtained the information, confirmed that it was complete, so it was not necessary to consult the newspapers, since the creators of the respective episode lists had done so.

For Nouvelle Aquitaine (AQ) and Occitanie (OC), the databases of the Central Reinsurance Company (Caisse Centrale de Réassurance – CCR) and the National Observatory of Natural Risks (Observatoire National des Risques Naturels - ONRN) were used to create PIRAGUA\_flood. In this case the information was completed in basis to the extreme rainfall records of Météo France. This ensured that all episodes that produced notable damage were included, although we must recognize that it is possible that episodes with little damage have gone unnoticed.

Table 1. Main characteristics of the study area. N.munic.: number of municipalities; Total pop.: total population; GDP: mean Gross Domestic Product for the region for the year indicated in the table ; \*: value relative to the part of the region that belongs to the Pyrenees. CNIH: Catálogo Nacional de Inundaciones Históricas (National Catalog of Historical Floods); INE: Instituto Nacional de Estadística (National Institute of Statistics); PERICFN: Plan de Emergencia ante el Riesgo de Inundaciones en la Comunidad Foral de Navarra (Emergency Plan for the Risk of Floods in the Foral Community of Navarra) (<https://gobiernoabierto.navarra.es/es/gobernanza/planes-y-programas-accion-gobierno/plan-emergencia-ante-riesgo-inundaciones-comunidad>); EPRI: Evaluación Preliminar del Riesgo de Inundación (Preliminary Flood Risk Assessment of the 2nd Cycle of the Eastern Cantabrian Hydrographic Area); CCR: Caisse Centrale de Réassurance (Central Reinsurance Company) (<https://catastrophes-naturelles.ccr.fr/>); ONRN: Observatoire National des Risques Naturels (National Observatory of Natural Risks) (<https://www.georisques.gouv.fr/articles-risques/onrn/acceder-aux-indicateurs-sinistralite#summary-target-1>); INSEE:

Institut national de la statistique et des études économiques (National Institute of Statistics and Economic Studies) (<https://www.insee.fr>); CENMA-IEA : Centre d'Estudis de la Neu i de la Muntanya d'Andorra-Institut d'Estudis Andorrans (Andorra Centre of Snow and Mountain Studies-Andorra Studies Institute). GDP data have been obtained from <https://Datosmacro.Expansion.Com/Pib/Espana-Comunidades-Autonomas> (Spanish regions), <https://fr.statista.com/statistiques/479490/pib-par-habitant-selon-regions-france/> (French regions), <https://datosmacro.expansion.com/pib/andorra> (Andorra).

| Region                  | Country | N.Munic.* | Area(km <sup>2</sup> )* | Total pop.* | GPD(M€)        | Information sources                                                                                                                                           |
|-------------------------|---------|-----------|-------------------------|-------------|----------------|---------------------------------------------------------------------------------------------------------------------------------------------------------------|
| Catalonia (CAT)         | Spain   | 213       | 12,027.38               | 255,804     | 255,154 (2022) | INUNGAMA (Llasat et al, 2014); FLOODHYMEX (Llasat et al, 2013); CNIH (DGPC, 2022); CCS, 2021; La Vanguardia newspaper; INE.                                   |
| Aragon (AR)             | Spain   | 122       | 10,594.59               | 60,624      | 41,763 (2022)  | CNIH (DGPC, 2022); CCS, 2021; El Heraldo de Aragón newspaper; INE.                                                                                            |
| Navarra (NA)            | Spain   | 186       | 6,418.75                | 462,932     | 22,595 (2022)  | CNIH (DGPC, 2022); CCS, 2021; PERICFN; Diario de Navarra newspaper; press releases from the Government of Navarre; SAFRAN (Quintana-Seguí et al., 2016); INE. |
| Basque Country (PV)     | Spain   | 87        | 2,585.55                | 222,533     | 79,350 (2022)  | CNIH (DGPC, 2022); CCS, 2021; EPRI (CHC and URA, 2018); INE.                                                                                                  |
| Nouvelle Aquitaine (AQ) | France  | 162       | 3,697.2                 | 104,568     | 189,300 (2021) | FLOODHYMEX (Llasat et al, 2013); CCR; Météo France; ONRN; INSEE.                                                                                              |
| Occitanie (OC)          | France  | 1025      | 14,711.01               | 409,040     | 181,300 (2021) | FLOODHYMEX (Llasat et al, 2013); CCR; Météo France; ONRN; INSEE.                                                                                              |
| Andorra (AND)           | Andorra | 7         | 468                     | 815,888     | 3,210 (2022)   | CENMA-IEA; Database of the Ministeri d'Ordenament Territorial (Ministry of Territorial Planning) of the Government of Andorra.                                |

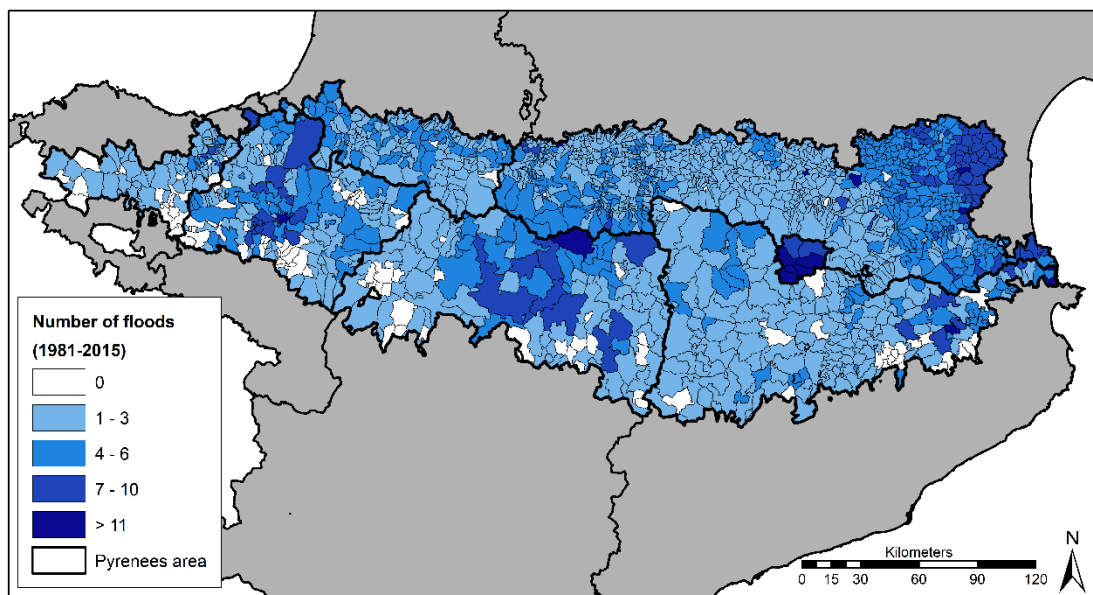

Figure 4 (old Figure 2): Number of total flood events that affected each municipality in the Pyrenees between 1981 and 2015.

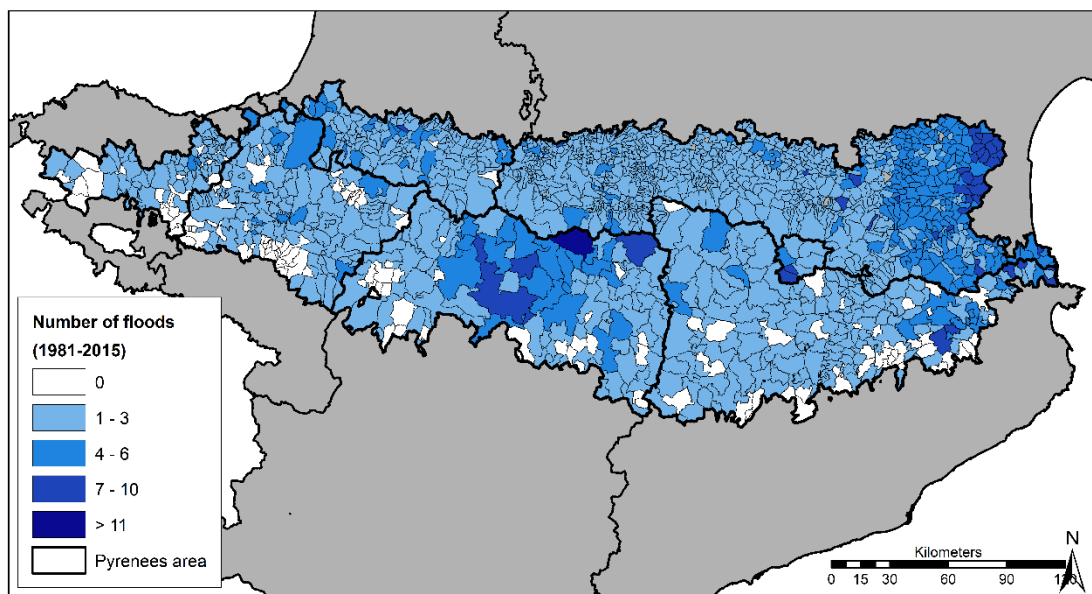

Figure 6 (old Figure 4): Number of notable flood events (catastrophic and extraordinary floods) that affected each municipality in the Pyrenees.

2. Some methodological details would require some additional explanations. This concerns both the procedure used for flood inventory (consultation of newspapers limited to pre-identified dates? How the 0.5 and 5 codes representing cars swept away and victims can be combined with the 1 to 3 codes representing flood severity?), and the methods used for analysis of trends (definition of the variable used) and weather types (definition of the “daily averaged” fields).

I believe that the new text in section 2.2 and new table 1 included in response to the previous question already includes the answer to the question relative to the flood inventory. As you have seen, the systematic consultation of the press day by day has been done for Catalonia. For the remaining regions it was limited to pre-identified data (CCS, CNIH, government releases, rainfall fields, etc.).

As for categories 0.5 and 5, these are independent of categories 0 to 3. A flood can be ordinary and cause victims, or it can be catastrophic and cause no victims. Previous publications have shown that the severity of the flood cannot be related to mortality. According to Llasat et al, 2014 (AR), 69% of catastrophic episodes had victims. We have modified the text and included a new figure to explain how we have proceeded to do the categorization:

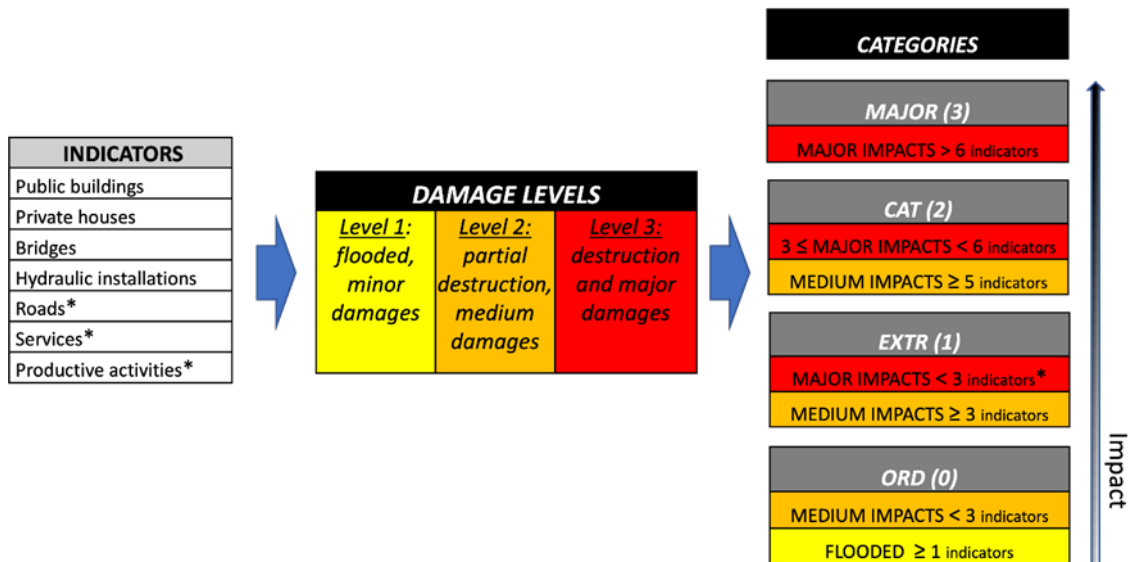

Figure 3: Criteria for categorizing flood events based on impacts. ORD (0): Ordinary flood event; EXTR (1): extraordinary flood event; CAT (2): catastrophic flood event; MAJOR (3): major catastrophic event. The level of damage is estimated from the direct impacts experienced, and a color scale is used (level 1: yellow; level 2: orange; level 3: red).

The category of flood events is based on the level of impacts and is divided into categories: 0 (ordinary), 1 (extraordinary), 2 (catastrophic), and 3 (major catastrophic), according to Figure 3, inspired by the criteria presented in previous publications (Barriendos et al., 2003; Llasat et al., 2013, 2016; Barrera-Escoda and Llasat, 2015). However, in these publications, the distinction between categories was purely subjective. In order to facilitate its reproduction by other authors, a table has been designed to help decide in which category an event can be classified. Firstly, the “Damage indicators” have been selected based on literature (Petrucci, 2013; Boudou et al., 2016; Vinet et al., 2016). For each one of the indicators, the “Damage level” has been analyzed, where level 1 refers to possible minor damage (small floods in basements, breakdowns in traffic lights, etc.), level 2 refers to medium damages (it includes floods inside buildings and on communication routes which can cause traffic interruptions, partial damage to infrastructure, etc.), and level 3 refers to major impacts in the indicator (partial or total destruction of buildings, roads, bridges, long lasting supply cuts, etc.). To classify flood episodes into categories, the level of damage in each of the seven indicators is taken into account, as shown in Figure 3. Fatalities are not included in Figure 3 as they can occur in any flood event category, although they are more likely to occur in catastrophic floods. The same applies to vehicles, as they can be swept away if they are parked on a creek where there is normally little water flow, without the river breaking its banks. This is why additional information has been included in the database, with the code of “0.5” if the episode swept away cars and “5” if there were fatalities. Since the category of the episode may be different for each affected Pyrenees municipality, the highest occurring level determines the category of the episode.

Regarding the methods used for analysis of trends we have expanded as it is showed in our answer to your comment relative to l.139-140, where the revised text is included. The trend analysis has been applied over the number of flood events per year, taking into account the total number and the different categories.

Regarding the Weather typing procedure, we have added additional figures and explanations. Further details are provided in the specific comments below referring to this issue.

3. Some sections (4.2 and 6) do not bring significant information in my opinion, and could be highly summarized based on a much more limited number of figures, to put the emphasis on other (more informative) sections.

Section 4.2. “Regional flood events distribution” has been considerably reduced, eliminating the figures, and focusing on the spatial distribution and the role that vulnerability and exposure to floods can play in this distribution. The figures of reference are the new figures 4 and 6, and the new text for chapter 4.2 is:

In the study period (1981-2015) there were 66 episodes in the Catalan Pyrenees in which the number of victims amounted to 21. Three episodes were catastrophic and 26 were extraordinary (Table 4). Figure 4 shows that the highest number of floods took place in the coastal foothills of the Pyrenees (16 episodes in the coastal municipality of Llançà, of which 62% were extraordinary) that confirms the strong role played by the entrance of Mediterranean air masses. In Aragon there were a total of 37 flood events, of which 13.5% were catastrophic. In 4 of them there were flash floods that led to the evacuation or death of several people who were canyoning. The number of victims amounts to 97, 87 of whom died at the Las Nieves campsite (Biescas) in August 1996 (Ayala Carcedo, 2002). Aragon has the county with the highest number of flash floods in the Pyrenees and it is Sobrarbe, where 26 events have taken place in 35 years. These are mainly events associated with thunderstorms in which the orography forces the rise and hinders the advance of convective systems, which can remain stationary in the same place (i.e. the Biescas case). The large number of torrents and dejection cones favors the production of flash floods. Given that these are very attractive mountain areas, it is possible that there are campsites, hikers or high-risk sportsmen and sportswomen, which increases vulnerability and exposure. The Navarre Pyrenees were affected by 24 events (17%, catastrophic) in which there was one victim. In this case, the damage is usually due to urban and peri-urban flooding, affecting its capital, Pamplona (203,418 inhabitants) that is the Pyrenean city with the largest number of recorded events (17). However, the most catastrophic episodes in Navarra have occurred in the Baztan valley, where numerous villages and small industries extend around the river. During the period 1981-2015 only 6 episodes of flooding (25% catastrophic) affected the Basque Pyrenees, with two victims. Most of them were concentrated in the eastern part of the region, near the Baztan valley. Although it is true that the costliest flood event recorded in Spain in that period took place in the Basque Country, in August 1983, the greatest damage occurred around the coastal estuaries, outside the Pyrenean region. Precisely, if the economic costs are taken into account, the CCS paid a total of €33.4 million<sub>2015</sub> (M<sub>2015</sub>) in flood compensation in the Catalan Pyrenean Region in the period 1996-2015, with the Val d'Aran being the most compensated region (a recreation and ski area with luxurious urbanizations near the river), mainly due to the June 2013 event that also affected Aragón and the French Pyrenees (Table 7). For the same period, the CCS paid a total of €15.2 M<sub>2015</sub> in flood compensations in Aragón, mainly due to the flood events of August 1996 (the Biescas case), that also affected Andorra, and the flood event of June 2013. The CCS paid a total of €65.8 M<sub>2015</sub> in flood compensation in Navarra, of which about €18 M<sub>2015</sub> went to Pamplona and €5.5 M<sub>2015</sub> went to Baztan. The CCS paid a total of €28.1 M<sub>2015</sub> in flood compensation in the Basque Pyrenees, of which the largest amounts went to Tolosa (19,525 inhabitants, the most important city in the region).

A total of 46 flood events were recorded in Andorra in the period 1981-2015, of which only 4.55% were catastrophic. It is a country of 79,824 inhabitants with a very high risk of flooding, especially because the most important towns and villages are surrounding the Valira River in a very narrow valley. The most important heavy rainfall events are usually due to Mediterranean perturbations that also affect Catalonia and/or Aragón (table 7). The maximum number of flood events occurred in the municipality of Andorra la Vella (27), followed by Sant Julià de Lòria (18). In total, 43 episodes of floods affected the French side of the Pyrenees, of which Nouvelle Aquitaine recorded 17 events and Occitanie recorded a total of 36 events, with a percentage of catastrophic episodes of 35.3% and 13.9%, respectively. Ten of these episodes were common to the two regions. In Occitanie, the municipality with the most flood episodes was Montgaillard, with 13, while in Nouvelle Aquitaine the maximum was lower, with 7 events in Mauleon-Licharre. Both populations are located closer to the Atlantic than the Mediterranean, being exposed above all to disturbances from the west and northwest. As a whole, however, the municipalities located further east in Occitanie stand out, where floods are mainly associated with disturbances such as those affecting Catalonia

and Andorra. It is noteworthy that all the municipalities in the French Pyrenees have recorded at least one catastrophic flood event, with the maximum recorded in the northeastern part, close to the Mediterranean.

The objective of section 6 was to show that some events were cross-border and that therefore collaboration between the authorities of different countries could improve the management of these types of episodes and early warning. In response to this and your comment, a paragraph about it has been included in the Discussion part.

On the other hand, old Table 3 has been replaced by the following figure 9 that illustrates the monthly distribution of cross-border flood events.

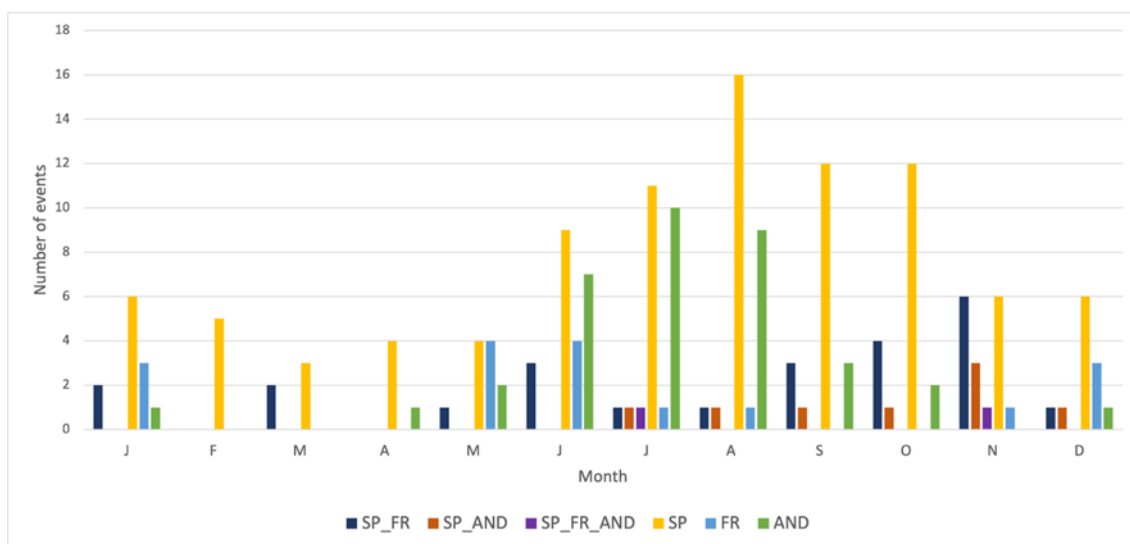

Figure 9. Monthly total number of flood events recorded in the Pyrenean Region (1981-2015), for each country (SP: Spain; FR: France; AND: Andorra) and for cross-border events.

And a table with transregional events have been included:

Table 6. Number of events that have affected each Pyrenean region and number of events that have affected each pair of regions indicated by the intersection by them.

|     | CAT | AR | NA | PV | AND | OC | AQ |
|-----|-----|----|----|----|-----|----|----|
| CAT | 66  |    |    |    |     |    |    |
| AR  | 10  | 37 |    |    |     |    |    |
| NA  | 0   | 1  | 24 |    |     |    |    |
| PV  | 1   | 1  | 3  | 16 |     |    |    |
| AND | 7   | 8  | 0  | 0  | 46  |    |    |
| OC  | 17  | 8  | 2  | 2  | 2   | 36 |    |
| AQ  | 3   | 4  | 5  | 4  | 1   | 10 | 17 |

- The links between floods and weather types (section 7) are not presented in an optimal manner. I think this section should include additional information to better illustrate the relative weights of the different weather types causing floods, and the temporal and geographical repartition of these weights.

The authors acknowledge the reviewer’s comment. We have addressed this point by adding a figure, as is explained in our answers to specific comments, that indicates the number of



flood days per weather type and Pyrenean region. This new figure allows to understand the spatial patterns of floods in relation to the different weather types. Additionally, we also improved the previous version of old figure 17, by adding the absolute number of flood days per WT and month. Further details on this are given in the corresponding comment about this issue.

5. Considering this, my opinion is that this paper would require major revisions before publication.

Thank you very much for the suggestions you have made that will considerably improve the article. We agree with you that the article required major changes, which we have already proceeded to make.

#### Detailed comments :

l.10 “the results of the analysis of the first”

Done

l.13 I suggest to replace “adapting to” with “and adapted to”

Done

l.16 Replace “paid out made” with “paid out”

Done

l.20 Please provide an explanation here for the meaning of «million2015 »

It means that the economic value has been updated to the year 2015, in order to compare it. This clarification has been added to the paper.

l.29 “unnoticed in the databases” Which databases? Do you mean here databases providing inventories of damaging flood events which are detailed in the next sentences, and/or more generally hydrometeorological databases that may also fail to capture heavy rainfall events and floods because of the too coarse density of observation networks. Could you please provide more details?

We agree. The entire introduction has been modified, including this sentence. The new Introduction is:

#### New **Introduction**

It is well known that floods in the Mediterranean area are usually flash floods (Gaume et al., 2009; Braud et al., 2014; Llasat et al., 2016), associated with very heavy rains with a short duration. In general, they cause local damage in coastal populations or mountainous regions, which can sometimes be very serious. Other times they can affect large regions, as happened with the Gard floods (France) in 2002 (Braud et al., 2010). Most of these episodes do not appear in the best-known flood databases such as EM-DAT (<https://www.emdat.be/>) or Munich Re’s NatCatSERVICE (<https://www.munichre.com/en/solutions/for-industry-clients/natcatservice.html>), because they are often based on indirect information (i.e. from the insurers that Munich Reinsurance reinsures) so many events are not included, either because the insurers are not aware of the events, or because they are not considered to have had sufficient impact (Llasat et al., 2013a; Wirtz et al., 2014). More systematic and precise studies are therefore necessary, but the high



workload required to elaborate these studies means that they are only available for few regions. This is the case of INUNGAMA (Llasat et al., 2014) that includes all the flood events that have affected Catalonia (NE Spain) between 1981 and 2020 (partial information available in the Flood Observatory of Catalonia, <https://experience.arcgis.com/experience/484172e12fae4cbb934441203ee04e36/>), and FLOODHYMEX (Llasat et al., 2013b), which currently includes all the catastrophic flood episodes (following the criteria of “catastrophic” introduced in Barriendos et al., 2003) that have affected Catalonia, Valencian Community and the Balearic Islands, in Spain, the former Languedoc-Roussillon region, Midi-Pyrénées and PACA (Provence-Alpes-Côte d’Azur) in France, Calabria, in Italy, and all Greece. This dataset can be found at <https://mistrals.sedoo.fr/catalogue/>

On the other hand, concern about the impact of climate change in mountainous regions, including natural hazards, has grown significantly in recent decades. Proof of this is the increase in publications on this topic (i.e. Beniston, 2003; Beniston and Stoffel, 2014; Zimmermann and Keiler, 2015; Steiger et al., 2022) including a cross-chapter devoted to Mountains in the Sixth Assessment Report of IPCC (2022). There are, however, few studies that address mountain massifs in their entirety from a climatic or meteorological perspective. This is the case of the Pyrenees, a cross-border mountainous region between Spain, France, and Andorra, where an example of such studies would be the article by Amblar-Francés et al. (2020). To facilitate the international management of a massif distributed between three countries, the Pyrenees Working Community (CTP) was created, which in turn founded the Pyrenean Climate Change Observatory (OPCC, <https://www.opcc-ctp.org/en>) in 2010. Given that the Pyrenees are key in the generation of water resources in the surrounding regions, where more than 20 million people live, as well as in the production of hydroelectric energy, the OPCC promoted the PIRAGUA project financed by the European call for projects POCTEFA (<https://www.opcc-ctp.org/en/piragua>) and whose results are available to the public in the OPCC Geoportal (<https://www.opcc-ctp.org/en/geoportal>).

One of the objectives of PIRAGUA project was the analysis of floods in the entire Pyrenean region, where floods, usually flash floods, can have a great direct impact on both the fixed and floating population, as well as on water services and energy resources. Some examples are the catastrophic flash flood at Camping las Nieves, in Biescas (Aragón, Spain), on August 7, 1996, in which 87 people drowned (García-Ruiz et al., 1996); the June 2013 floods with catastrophic damages in Spain and France (<https://hepex.org.au/flash-floods-in-the-french-western-and-central-pyrenees-17-19-june-2013/>); or the floods produced on 6-8 November 1982 (Trapero et al., 2013) that affected the three Pyrenean countries. The recent death of two people who were canyoning in the Pyrenees of Aragón (Spain) on September 2, 2023, when a flash flood event occurred is another example of this type of event that most people are unaware of. However, until now there is no database or flood catalogue that specifically covers the Pyrenean regions, and even less so, the Pyrenees massif as a whole. For this reason, and in the same way that the final objective of FLOODHYMEX was to cover the entire Mediterranean region, it was decided to create a similar database for the Pyrenees, but that would include all flood episodes.

The aim of this article is to present the first systematic database of flood episodes covering the entire Pyrenees massif, for the period 1981-2015. This database is available at <http://hdl.handle.net/10261/270351> (Llasat et al., 2022). Following the introduction of the study area, the structure of the base, the criteria followed for its construction, and the sources of information used are shown. The spatial and temporal distribution of flood episodes, both in the massif and the administrative regions, as well as the weather types, are then analysed. The paper ends with conclusions and discussion, where some adaptation measures are also commented.

### **I.30 Could you provide references or URLs for these two databases?**

All the references and URLs to databases have been included in the caption of Table 1.

Table 1. Main characteristics of the study area. N.munic.: number of municipalities; Total pop.: total population; GDP: mean Gross Domestic Product for the region for the year indicated in the table ; \*: value relative to the part of the region that belongs to the Pyrenees. CNIH: Catálogo Nacional de Inundaciones Históricas (National Catalog of Historical Floods); INE: Instituto Nacional de Estadística (National Institute of Statistics); PERICFN: Plan de Emergencia ante el Riesgo de Inundaciones en la Comunidad Foral de Navarra (Emergency Plan for the Risk of Floods in the Foral Community of Navarra) (<https://gobiernoabierto.navarra.es/es/gobernanza/planes-y-programas-accion->

gobierno/plan-emergencia-ante-riesgo-inundaciones-comunidad); EPRI: Evaluación Preliminar del Riesgo de Inundación (Preliminary Flood Risk Assessment of the 2nd Cycle of the Eastern Cantabrian Hydrographic Area); CCR: Caisse Centrale de Réassurance (Central Reinsurance Company) (<https://catastrophes-naturelles.ccr.fr/>); ONRN: Observatoire National des Risques Naturels (National Observatory of Natural Risks) (<https://www.georisques.gouv.fr/articles-risques/onrn/acceder-aux-indicateurs-sinistralite#summary-target-1>); INSEE: Institut national de la statistique et des études économiques (National Institute of Statistics and Economic Studies) (<https://www.insee.fr>); CENMA-IEA : Centre d'Estudis de la Neu i de la Muntanya d'Andorra-Institut d'Estudis Andorrans (Andorra Centre of Snow and Mountain Studies-Andorra Studies Institute). GDP data have been obtained from <https://Datosmacro.Expansion.Com/Pib/Espana-Comunidades-Autonomas> (Spanish regions), <https://fr.statista.com/statistiques/479490/pib-par-habitant-selon-regions-france/> (French regions), <https://datosmacro.expansion.com/pib/andorra> (Andorra).

**l.34-35 “there are very few such episodes that have affected the Pyrenees Mountain region on the databases.” Please indicate which databases are concerned: databases from reinsurance companies? For enhanced clarity, maybe this sentence should be rather placed just after the sentence pointing out the limits of databases from insurers.**

The sentence has been modified and placed just after the sentence pointing out the limits of databases from insurers. Please, see the new Introduction that I have included to answer a previous question.

**l.38-39 please formulate more explicitly the regions concerned in each country, and if the whole Greece is concerned: “the Catalonia region and the Balearic Islands in Spain, the former Languedoc-Roussillon, Midi-Pyrénées and PACA (Provence-Alpes-Côte d’Azur) regions in France, the Calabria region in Italy, and the whole Greece.”**

We have replaced our sentence for this one proposed by you.

**l.46 GDP: please detail the acronym**

GDP means Gross Domestic Product. It has been added to the text.

**l.50 please specify the country (Spain I can imagine)**

The region correspond to three countries: Catalonia, Aragon, Navarra and Basque Country, in Spain; Nouvelle Aquitaine and Occitanie in France; and Andorra. They have been added to the text.

**l.51 where did this september 2023 event occur?**

On 2 September 2023 a flash flood event in a canyon in the Pyrenees of Aragon produced the death of two people. We have modified the sentence in the new Introduction. You can see information about this in the following press news:

- <https://www.heraldo.es/noticias/aragon/huesca/2023/09/03/el-canon-donde-murieron-los-dos-jovenes-multiplico-por-10-su-caudal-en-unas-horas-1675558.html> (no se puede acceder sin registro)
- <https://ub-mynews-es.sire.ub.edu/hu/document/00001541-20230903-000482/>
- <https://www.eldiariomontanes.es/sociedad/mueren-dos-barranquistas-huesca-crecida-rio-consecuencia-20230902185859-ntrc.html?ref=https%3A%2F%2Fwww.eldiariomontanes.es%2Fsociedad%2Fmueren-dos-barranquistas-huesca-crecida-rio-consecuencia-20230902185859-ntrc.html>

- <https://www.sport.es/es/noticias/sucesos/mueren-personas-barranco-huesca-plena-dana-91629690>

[l.54 do you mean a comprehensive database of damaging flood events?](#)

Effectively, there is not any database of flood events that refers specifically to the Pyrenean Region. There are national databases, or some regional databases like INUNGAMA that covers the entire Catalonia, but none so far has focused on the municipalities that make up the cross-border region of the Pyrenees.

[l.86 “For events that were not known, it was even more time-consuming to identify new events on the CCS database” I don’t understand this, could you please reformulate?](#)

We agree with you that the phrase is not clear. The text refers to the fact that the analysis of the CCS database made it possible to identify other flood episodes that did not appear in the initial INUNGAMA database. The entire section “2.2 Sources of information and identification of flood events” has been modified as previously shown.

[l.87 could you indicate here if the newspapers were systematically consulted for the whole period or just for the dates pre-identified from other source of data ? \(I imagine the second option is the right one\)](#)

The INUNGAMA database, which was used for Catalonia, is built from the systematic and direct consultation of all La Vanguardia newspaper day by day. The part of PIRAGUA\_flood corresponding to Catalonia has been created from this and updated for the project, and therefore comes from a systematic consultation of the Vanguardia, expanded with cases identified through the other cited sources that did not constitute news in the Vanguardia. In the other cases, specific news was sought. We hope, however, that the explanations and the new text that I have introduced above already answer all these questions, so I will not repeat them here.

[l.92 rather “included in the “?”](#)

Done

[l.95-97 please provide references and/or URLs for these sources.](#)

Done. In the new table 1 all the URLs of the sources that are publicly available have been included

[l.100-104 again here, a reference and/or URL would be useful.](#)

In the case of Andorra data are not publicly available.

[l.118 Please add here a sentence to clarify the meaning of “level” in table 1 “In table 1 the levels 1 to 3 correspond to the level of damage observed for different categories of assets: level 1 refers to possible ..”](#)

Thank you very much. The redaction of the paragraph has been improved to clarify the meaning of "level" and a new Figure have been added to explain the categories.

[Table1: I think it is not necessary here to repeat four times this table. The explanation provided in the caption for the classification in the four categories is sufficient, and could be placed directly in the text.](#)

In response to your comment and the comment of reviewer 1, Figure 3 has been created, which contains a table with the methodology followed, in order to create a tool that helps classify flood episodes based on impacts. Until now the decision had been made in a totally subjective way taking into account the definition of the different types of episodes. New figure, included in my previous answers, has been created.

**l.123 It is not clear here how these additional categories (car swept away and fatalities) are combined with the four initial categories (ordinary – extraordinary – catastrophic – major catastrophic). For instance is a catastrophic event with fatalities classified in the category 2 or 5 ? Could you clarify this ?**

A catastrophic flood does not necessarily have to produce victims and vice versa, there can be victims in any other category of flood, since it also depends on the place where the victim was and his/her vulnerability. Likewise, it is possible for an ordinary flood to sweep away vehicles, even if there is no overflow. This happens in streams that are usually dry and are used as parking. This is, therefore, additional information to the flood category. For example, in Aragon only 3 episodes involved cars, one of which was catastrophic, another extraordinary and another ordinary; in Catalonia, 6 episodes involved cars, of which 4 were ordinary and 2 extraordinary; in Andorra there were 9 of which 7 were ordinary and 2 extraordinary. However, as previously answered, the entire paragraph has been modified.

**l.134-136 If possible, please provide references or URL for these sources of data.**

Thanks for your comment. The revised paragraph with URLs is:

The number of flood events was represented at a municipal level using Geographic Information Systems (GIS), ArcGIS 10.4 and QGIS 3.10. Spatial analysis was carried out for all categories of flood episodes. To do this, for Catalonia it has been used the database of municipalities in shapefile format provided by the Cartographic and Geological Institute of Catalonia (ICGC) (<https://www.icgc.cat/es/Administracion-y-empresa/Descargas/Capas-de-geoinformacion/Divisiones-administrativas>). For the other regions, the database of municipalities and regions in the Geographic Information System of the European Commission (GISCO) has been used, which is part of Eurostat (Eurostat <https://ec.europa.eu/eurostat/web/gisco/geodata/reference-data/administrative-units-statistical-units/countries>). Regarding the study area, it has been used the defined delimitation in PIRAGUA (OPCC) in shapefile format (<https://www.opcc-ctp.org/en/geoportal>).

**l.139-140 Could you please describe here in more details the variables used for trend analysis: number of events per year? Number of events per season and per year? Number of events per category and per year? .**

We thank the reviewer for this suggestion. We have expanded the description within these lines to include more information on the variables used in the trend analysis (by moving some information that was at the end of this section and complementing it). The revised section is:

### **3.3 Temporal analysis**

The temporal analysis includes the monthly evolution of the events, in average, and the study of the possible annual trends. These analyses were carried out for the Pyrenees as a whole, as well as for the regions of Catalonia, Andorra, Aragon, the Basque Country, Navarre, Aquitaine and Occitanie. Likewise, for the severity of flood events, their evolution was studied considering the total number of events of each category

per year (0, ordinary; 1, extraordinary; 2, catastrophic; or notable -combined number of extraordinary and catastrophic).

A linear regression was used to obtain the trend, while Mann-Kendall test was implemented to check its significance (Mann, 1945; Kendall, 1975). The Mann-Kendall test states as a null hypothesis (H0) that there is no monotonic tendency in the series, while the alternative hypothesis (Ha) is that there is trend (positive or negative). This is a non-parametric test, and it can therefore be applied to all types of data regardless of the underlying probability density function. In the present study, it was established that a trend is significant when the p-value of the Mann-Kendall statistic is below 0.05 ( $p < 0.05$ ).

l. 153 “was then averaged on a daily basis” Do you mean here that the fields were temporally averaged for each calendar day ? This seems surprising since the considered fields may largely vary within one day. I think a clarification and a justification are necessary here.

Sorry for the misunderstanding. We did not average each calendar day, but we converted our 6-hourly data to daily by calculating the daily average. We have rephrased it in the text to be clearer. The revised text is:

The weather types associated with each flood episode have been classified using the mean sea level pressure (mslp) and the geopotential height at 500 hPa (z500), obtained from the ERA-5 reanalysis (Hersbach et al., 2020) in its native resolution ( $0.25^\circ$ ) for the geographical domain  $20^\circ\text{W}$ - $20^\circ\text{E}$ ,  $30^\circ\text{N}$ - $60^\circ\text{N}$ . The original hourly data spanning from 1981 to 2015 were averaged on a daily scale to compute the synoptic classification described below.

l. 150 – 171 I think a figure would be useful here to illustrate how many categories were used, and how the mslp and z500 fields differ within each class (for instance through a reference to fig 16).

Thank you again for your comment. We have included a new figure showing the amount of variance explained by each principal component. This figure (now Figure 4, that is showed below), called scree plot, was just described in the text but not provided. We hope it helps you to understand the process of selecting components.

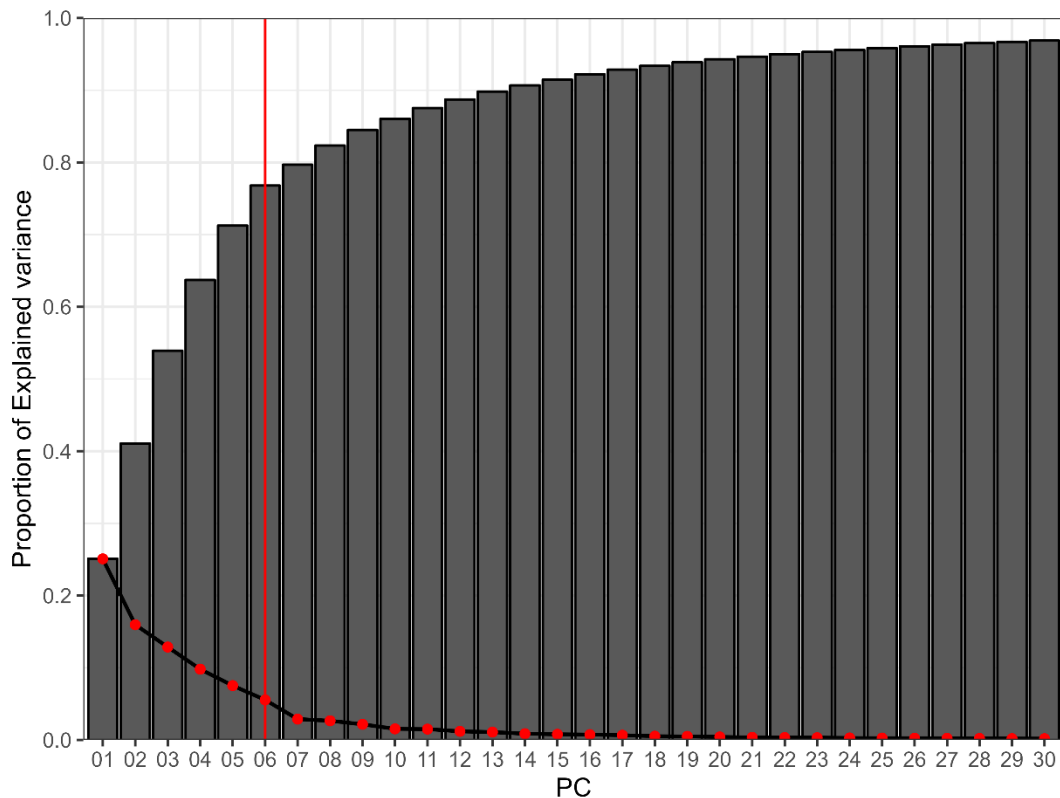

Figure 4. Scree test for the first 30 principal components (PCs). The red dots show the explained variance (%) for each principal component, while the grey bars show the cumulative explained variance. The red vertical line indicates the cut off PC. Thus, 6 PCs were retained accounting for the 78% of the total variance.

l.178-179 The high difference in the number of events depending on the considered country is rather surprising, particularly the low number of ordinary events recorded for France. This difference may be related to differences in the sources of data used for each country, with possibly a different level of detail and comprehensiveness in each. But this does not seem to be confirmed by fig.2 that shows a relatively similar frequency of events at the municipality scale for France and Spain (but a higher frequency for Andorra). I think this question of representativeness of inventory should be discussed here.

Following your comments, we have modified the text.

Table 4 is provided in order to summarise the information that will be analysed in this section. It should be noted that the same event can affect more than two regions. This is why we have calculated the total number of times that the different Pyrenees regions have been affected by floods, TOTAL, and the total number of episodes that have affected the massif, TOTAL ep (considering that an episode that affects more than one region is counted only once). In this article, it is considered that those floods that occur on the same day are related to the same meteorological synoptic situation, and, therefore, it is the same episode that has produced floods in different places. This clarification is necessary because in other articles (i.e. Barriandos et al, 2019; Gil-Guirado et al., 2019) the criterion used is based on the sum of all the locations where flooding has occurred. If it would be considered the number of times the regions have been affected by flood events, the figure of 242 would be obtained, but if the criteria just explained is taken into account, it is concluded that the Pyrenees massif was affected by 181 flood episodes between 1981 and 2015. Of these events, 128

affected the Spanish part, 43 affected the French part, and 46 affected Andorra. Some of the events were common to two or all three countries or they affected different regions from the same country, with a total of 41 “transregional” episodes. One example was the flood event that occurred between June 17 and 19, 2013, that affected Spain and France. In Catalonia, the municipalities with the greatest damage were Salardú, Arties, Escunhau, Vielha, Bossòst, and Les; in Aragon, it was Cerler, Castejón de Sos and Benasque; in Aquitaine, there was catastrophic damage in Lourdes and Arreau (Hautes-Pyrénées), Nay (Pyrénées-Atlantiques) and Saint-Béat (Haute-Garonne). Some towns were isolated due to road damage, landslides or rock falls. Numerous bridges, some buildings and campsites were totally or partially destroyed by the violent floods that carried rocks and remains of vegetation. Numerous houses and crop lands were flooded, causing cuts in all types of supplies. It was, therefore, a flood event of category 3.

Figure 4 shows that the highest concentration of flood episodes occurs in Andorran municipalities and in the easternmost area of Occitanie and Catalonia. Some municipalities in Aragón and Navarra also stand out, while in the Basque Country and Nouvelle Aquitaine, no municipality have recorded more than 7 episodes of flooding. The region with the highest total number of flood events was Catalonia (66), followed by Andorra (46), while the lowest number was recorded in the Basque Country (16). Andorra is the region that records the highest percentage of ordinary floods (67.4%) although the absolute maximum corresponds to Catalonia (Fig.5). This regional difference may be related to both the orography and the meteorological disturbances causing intense rains, which will be discussed later.

We cannot forget, however, that it is possible that some ordinary floods in France have gone unnoticed (Fig. 5). This is why figure 6 has been constructed. It shows the distribution by municipality of flood events with notable damage (that is, they were extraordinary or catastrophic). The distribution hardly changes with respect to figure 4, and only the maxima of some municipalities are smoothed out. Of the 181 flood events, 52% produced notable damages in one or more of the Pyrenean regions. It is observed that notable flooding events are concentrated above all in the municipalities of the Pyrenees closest to the Mediterranean, both on the Spanish and French sides. The central part of the Spanish Pyrenees also stands out, located at the foot of the highest mountains. The highest number of catastrophic flood events was recorded in Nouvelle Aquitaine, followed by Occitanie and Aragón.

[l.182 “It means that if the numbers of events that have affected each Pyrenean region are added, the result is 242 events.”](#)

The sentence has been modified as you can see in the previous answer to your comments.

[l.183 A more simple formulation can be used here “In this article, it is considered that ..”](#)

The sentence has been modified following your proposal. Thank you.

[l.192 To clarify please mention explicitly which municipality was hit by the 2013 Garonne river catastrophic flood.](#)

In order to answer your question we have added the following paragraph:

One example was the flood event that occurred between June 17 and 19, 2013, that affected Spain and France. In Catalonia, the municipalities with the greatest damage were Salardú, Arties, Escunhau, Vielha, Bossòst, and Les; in Aragon, it was Cerler, Castejón de Sos and Benasque; in Aquitaine, there was catastrophic damage in Lourdes and Arreau (Hautes-Pyrénées), Nay (Pyrénées-Atlantiques) and Saint-Béat (Haute-Garonne). Some towns were isolated due to road damage, landslides or rock falls. Numerous bridges, some buildings and campsites were totally or partially destroyed by the violent floods that carried rocks and remains of vegetation. Numerous houses and crop lands were flooded, causing cuts in all types of supplies. It was, therefore, a flood event of category 3.



l.202-203 Figure 3 and table 2 seem to confirm that the inventory of ordinary floods is incomplete in Occitanie, Nouvelle Aquitaine, and Aragon regions (see my remark above). I think this could be stated more explicitly here, and maybe some reasons for this could also be advanced country (for France, I think events are recorded only if considered as having exceeded a 10-year return period).

Both figure 3 and table 2 have been improved, and the text referring to them has also been improved.

Section 4.1...” We cannot forget, however, that it is possible that some ordinary floods in France have gone unnoticed, as we have explained in section 2.2 (Fig. 5). This is why figure 6 has been constructed. Figure 4 shows the distribution by municipality of flood events with notable damage (that is, they were extraordinary or catastrophic). The distribution hardly changes with respect to figure 4, and only the maxima of some municipalities are smoothed out.”

Section 2.2...”For Nouvelle Aquitaine (AQ) and Occitanie (OC), the databases of the Central Reinsurance Company (Caisse Centrale de Réassurance – CCR) and the National Observatory of Natural Risks (Observatoire National des Risks Naturels - ONRN) were used to create PIRAGUA\_flood. In this case the information was completed in basis to the extreme rainfall records of Météo France. This ensured that all episodes that produced notable damage were included, although it is possible that some minor flood events with little damage have gone unnoticed.”...

l.204 I think focusing on extraordinary and catastrophic floods is the good choice here, provided the doubts on the inventories of ordinary floods.

It is true that most of the discourse in the article will focus on notable flooding episodes. However, despite we are aware that some minor floods on the French side may not have been captured in the database, we consider it important to retain the information from ordinary floods, as they provide useful information to identify cross-border events, partial trends, etc. From a certain point of view, the fact of including the ordinary flood events in the database is one of the added values of the PIRAGUA\_flood database. In this way, database users will be able to have information that is not easy to find.

l.223 I do not see this information of 39 victims in November in table 2 or other figures. Maybe an histogram showing the seasonality of floods and victims would complement usefully the information provided in table 2 (this could be grouped with figure 12).

We have prepared two figures in order to select the best one. The first shows the monthly evolution of fatalities for the different regions. The second solution consists in adding this information in old figure 12

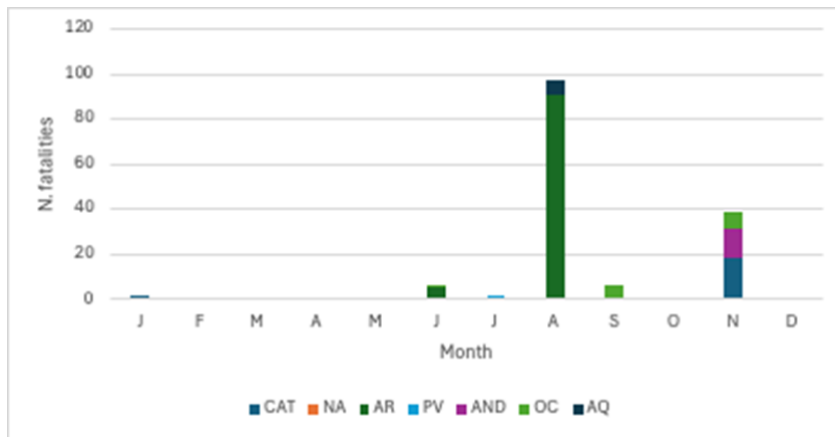

Monthly distribution of number of fatalities in Pyrenees Regions

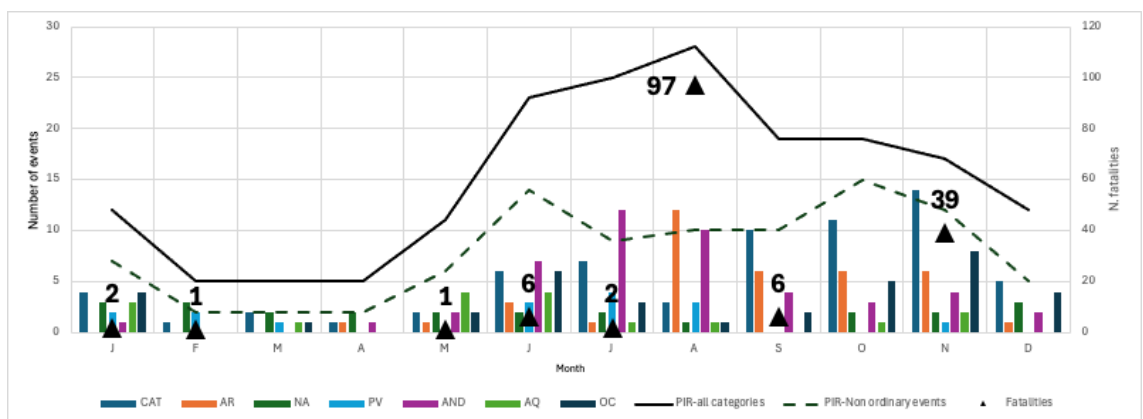

Figure 12: Monthly distribution of the total number of flood cases for the different regions. The solid line shows the entire Pyrenees-POCTEFA region, and the dashed line shows the number of significant events (period 1981-2015). The triangles indicate the total number of casualties in the entire study area, the value is included next to the symbol.

[l.241-242, 252-253, 264-265](#) Please mention here that the compensation amounts stand for the whole regions.

Given that the CCS only compensates for damage in the Spanish part, it is not possible to know the damage related to the entire Pyrenees since it has not been possible to have this type of systematic information for the other regions. However, taking into account your comments and those from the first reviewer, the entire paragraph has been modified.

#### 4.2 Regional flood events distribution

In the study period (1981-2015) there were 66 episodes in the Catalan Pyrenees in which the number of victims amounted to 21. Three episodes were catastrophic and 26 were extraordinary (Table 4). Figure 4 shows that the highest number of floods took place in the coastal foothills of the Pyrenees (16 episodes in the coastal municipality of Llança, of which 62% were extraordinary) that confirms the strong role played by the entrance of Mediterranean air masses. In Aragon there were a total of 37 flood events, of which 13.5% were catastrophic. In 4 of them there were flash floods that led to the evacuation or death of several people who were canyoning. The number of victims amounts to 97, 87 of whom died at the Las Nieves campsite (Biescas) in August 1996 (Ayala Carcedo, 2002). Aragon has the county with the highest number of flash floods in the Pyrenees and it is Sobrarbe, where 26 events have taken place in 35 years. These are mainly events associated with thunderstorms in which the orography forces the rise and hinders the advance of convective systems, which can remain stationary in the same place (i.e. the Biescas case). The large number of torrents and dejection cones favors the production of flash floods. Given that these are very

attractive mountain areas, it is possible that there are campsites, hikers or high-risk sportsmen and sportswomen, which increases vulnerability and exposure. The Navarre Pyrenees were affected by 24 events (17%, catastrophic) in which there was one victim. In this case, the damage is usually due to urban and peri-urban flooding, affecting its capital, Pamplona (203,418 inhabitants) that is the Pyrenean city with the largest number of recorded events (17). However, the most catastrophic episodes in Navarra have occurred in the Baztan valley, where numerous villages and small industries extend around the river. During the period 1981-2015 only 6 episodes of flooding (25% catastrophic) affected the Basque Pyrenees, with two victims. Most of them were concentrated in the eastern part of the region, near the Baztan valley. Although it is true that the costliest flood event recorded in Spain in that period took place in the Basque Country, in August 1983, the greatest damage occurred around the coastal estuaries, outside the Pyrenean region. Precisely, if the economic costs are taken into account, the CCS paid a total of €33.4 million updated at 2015 ( $M_{2015}$ ) in flood compensation in the Catalan Pyrenean Region in the period 1996-2015, with the Val d'Aran being the most compensated region (a recreation and ski area with luxurious urbanizations near the river), mainly due to the June 2013 event that also affected Aragón and the French Pyrenees (Table 7). For the same period, the CCS paid a total of €15.2  $M_{2015}$  in flood compensations in Aragón, mainly due to the flood events of August 1996 (the Biescas case), that also affected Andorra, and the flood event of June 2013. The CCS paid a total of €65.8  $M_{2015}$  in flood compensation in Navarra, of which about €18  $M_{2015}$  went to Pamplona and €5.5  $M_{2015}$  went to Baztan. The CCS paid a total of €28.1  $M_{2015}$  in flood compensation in the Basque Pyrenees, of which the largest amounts went to Tolosa (19,525 inhabitants, the most important city in the region).

Figures 2, 3 and 5-6-7: the color scales used in the maps showing the number of floods per municipality could be homogeneous among the different figures. This would confirm the consistency between the figures and facilitate the comparisons.

Figures 2 (new 4) and 4 (new 6) have been modified and we have used the same scale for both. Figures 5,6 and 7 have been eliminated because they did not provide new information (this is clearly seen in figures 4 and 6), which has allowed the regional analysis to be reduced. We have already included the new figures in this letter.

l.274 and fig. 8 please keep the same name for Toulouse or Tolosa

Thank you for the observation. It was a mistake. They refer to Tolosa. Toulouse is another city in France.

Section 4.2 and figures 5-11: this section (and the related figures) is rather linear and repetitive, and brings very limited new information if compared with table 2 and figures 2-4. I think adding a general figure of the CCS compensations at the same geographical scale as figures 2-4, and providing further comments in section 4.1 about the differences between regions based on table 2 and figures 2-4, would be largely sufficient.

Following your suggestion we have deleted figures 5 to 10, and synthesized section 4.2 as follows:

#### 4.2 Regional flood events distribution

In the study period (1981-2015) there were 66 episodes in the Catalan Pyrenees in which the number of victims amounted to 21. Three episodes were catastrophic and 26 were extraordinary (Table 4). Figure 4 shows that the highest number of floods took place in the coastal foothills of the Pyrenees (16 episodes in the coastal municipality of Llançà, of which 62% were extraordinary) that confirms the strong role played by the entrance of Mediterranean air masses. In Aragón there were a total of 37 flood events, of which 13.5% were catastrophic. In 4 of them there were flash

floods that led to the evacuation or death of several people who were canyoning. The number of victims amounts to 97, 87 of whom died at the Las Nieves campsite (Biescas) in August 1996 (Ayala Carcedo, 2002). Aragon has the county with the highest number of flash floods in the Pyrenees and it is Sobrarbe, where 26 events have taken place in 35 years. These are mainly events associated with thunderstorms in which the orography forces the rise and hinders the advance of convective systems, which can remain stationary in the same place (i.e. the Biescas case). The large number of torrents and dejection cones favors the production of flash floods. Given that these are very attractive mountain areas, it is possible that there are campsites, hikers or high-risk sportsmen and sportswomen, which increases vulnerability and exposure. The Navarre Pyrenees were affected by 24 events (17%, catastrophic) in which there was one victim. In this case, the damage is usually due to urban and peri-urban flooding, affecting its capital, Pamplona (203,418 inhabitants) that is the Pyrenean city with the largest number of recorded events (17). However, the most catastrophic episodes in Navarra have occurred in the Baztan valley, where numerous villages and small industries extend around the river. During the period 1981-2015 only 6 episodes of flooding (25% catastrophic) affected the Basque Pyrenees, with two victims. Most of them were concentrated in the eastern part of the region, near the Baztan valley. Although it is true that the costliest flood event recorded in Spain in that period took place in the Basque Country, in August 1983, the greatest damage occurred around the coastal estuaries, outside the Pyrenean region. Precisely, if the economic costs are taken into account, the CCS paid a total of €33.4 million<sub>2015</sub> ( $M_{2015}$ ) in flood compensation in the Catalan Pyrenean Region in the period 1996-2015, with the Val d'Aran being the most compensated region (a recreation and ski area with luxurious urbanizations near the river), mainly due to the June 2013 event that also affected Aragón and the French Pyrenees (Table 7). For the same period, the CCS paid a total of €15.2  $M_{2015}$  in flood compensations in Aragón, mainly due to the flood events of August 1996 (the Biescas case), that also affected Andorra, and the flood event of June 2013. The CCS paid a total of €65.8  $M_{2015}$  in flood compensation in Navarra, of which about €18  $M_{2015}$  went to Pamplona and €5.5  $M_{2015}$  went to Baztan. The CCS paid a total of €28.1  $M_{2015}$  in flood compensation in the Basque Pyrenees, of which the largest amounts went to Tolosa (19,525 inhabitants, the most important city in the region).

A total of 46 flood events were recorded in Andorra in the period 1981-2015, of which only 4.55% were catastrophic. It is a country of 79,824 inhabitants with a very high risk of flooding, especially because the most important towns and villages are surrounding the Valira River in a very narrow valley. The most important heavy rainfall events are usually due to Mediterranean perturbations that also affect Catalonia and/or Aragón (table 7). The maximum number of flood events occurred in the municipality of Andorra la Vella (27), followed by Sant Julià de Lòria (18). In total, 43 episodes of floods affected the French side of the Pyrenees, of which Nouvelle Aquitaine recorded 17 events and Occitanie recorded a total of 36 events, with a percentage of catastrophic episodes of 35.3% and 13.9%, respectively. Ten of these episodes were common to the two regions. In Occitanie, the municipality with the most flood episodes was Montgaillard, with 13, while in Nouvelle Aquitaine the maximum was lower, with 7 events in Mauleon-Licharre. Both populations are located closer to the Atlantic than the Mediterranean, being exposed above all to disturbances from the west and northwest. As a whole, however, the municipalities located further east in Occitanie stand out, where floods are mainly associated with disturbances such as those affecting Catalonia and Andorra. It is noteworthy that all the municipalities in the French Pyrenees have recorded at least one catastrophic flood event, with the maximum recorded in the northeastern part, close to the Mediterranean.

### [l.306 “The events are distributed..”](#)

Done.

l.315-317 and figure 12: I think showing distributions based on the total number of events is rather misleading here because of the possible heterogeneity between regions in the inventory of ordinary events. This is probably the reason why the joint distribution is unimodal close to the distribution of rainfall events in Spain. I think showing statistics based only on the extraordinary and catastrophic events would have been more relevant and representative here (i.e. the bimodal distribution).

The interest in maintaining ordinary floods in Figure 12 lies in the fact that it shows a unimodal distribution, with a maximum in summer, coinciding with the studies that give the percentage of convective precipitation. This suggests that these are flooding episodes linked to intense and local rains of a convective nature, probably brief. On the contrary, the bimodal character would be a consequence of the integration of the autumn maximum typical of the Mediterranean region and the spring maximum, more typical of the central and western Pyrenees.

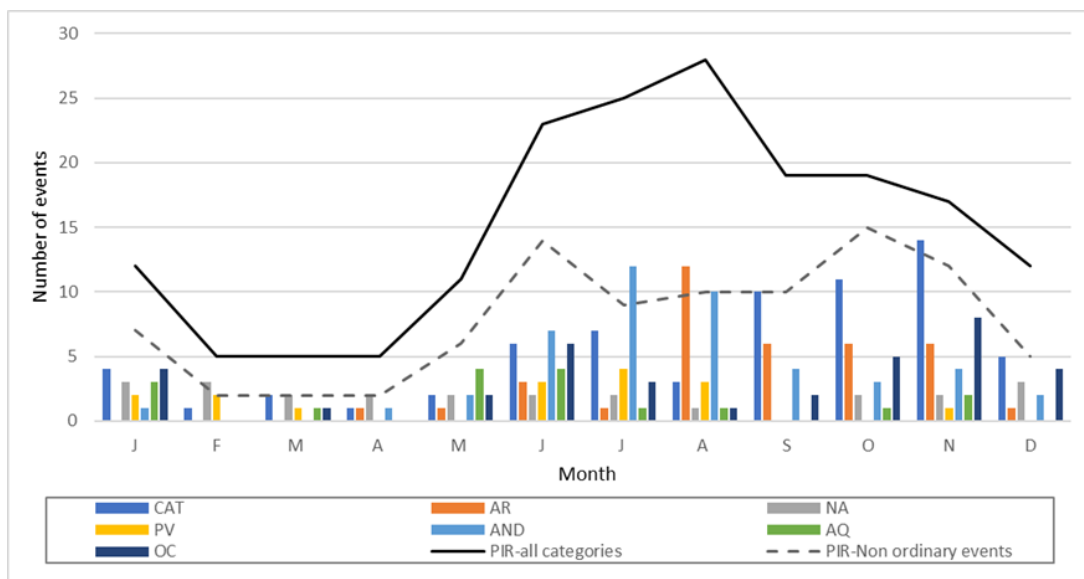

Figure 7: Monthly distribution of the total number of flood cases for the different regions. The solid line shows the entire Pyrenees-POCTEFA region, and the dashed line shows the number of notable events (period 1981-2015).

l.320 these results are rather related to Table 2 and fig.13 (not fig.12)

It has been modified. Thank you

Section 6 and tables 3-4 bring very low added value if compared with section 5, and I do not see the interest to develop the cross-border episodes. I would suggest to remove this, or maybe to present just a table with the regions affected by the 41 “transregional” events (rather than cross border). I also think the development about the 1982 (figures 14 and 15) could be rather presented in the methods section (section 3.1) to illustrate the results of the flood inventory.

Old tables 3 and 4 showed the transnational flood events, and for this reason we have used the name of the countries. In these tables we don’t show the cross-border events between regions. Considering your comment, we have completely modified both tables. Old Table

3 has been replaced by the following figure 9 that illustrates the monthly distribution of cross-border flood events.

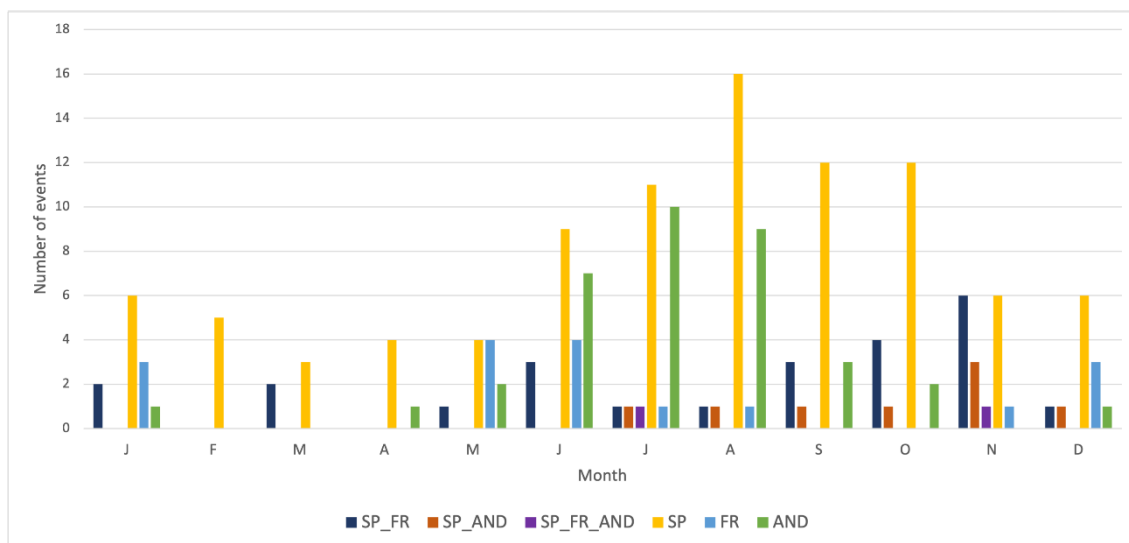

Figure 9. Monthly total number of flood events recorded in the Pyrenean Region (1981-2015), for each country (SP: Spain; FR: France; AND: Andorra) and for cross-border events.

After that, we have created a new table that includes cross-border (transregional) events:

Table 6. Number of events that have affected each Pyrenean region and number of events that have affected each pair of regions indicated by the intersection by them.

|     | CAT | AR | NA | PV | AND | OC | AQ |
|-----|-----|----|----|----|-----|----|----|
| CAT | 66  |    |    |    |     |    |    |
| AR  | 10  | 37 |    |    |     |    |    |
| NA  | 0   | 1  | 24 |    |     |    |    |
| PV  | 1   | 1  | 3  | 16 |     |    |    |
| AND | 7   | 8  | 0  | 0  | 46  |    |    |
| OC  | 17  | 8  | 2  | 2  | 2   | 36 |    |
| AQ  | 3   | 4  | 5  | 4  | 1   | 10 | 17 |

Section 7: this section shows the temporal distribution of each of the weather types causing floods (figure 17), and some examples of the floods caused by each weather type are provided. I think some information illustrating the weights of each weather type in the generation of floods is missing here. It could be for instance a table similar to fig.17 but showing the distribution (or the numbers) of floods related to each weather type for each month of the year, and also the global distribution of weather type having caused floods. Also, some maps showing the number of floods in each municipality related to one weather type (or to groups of weather types occurring mostly in summer or autumn) would probably be informative about the regions affected for each category of weather type.

Thank you for your valuable suggestions. We have provided a new version of old figure 17 including a) the spatial distribution of flood days per CWT and b) both the relative and absolute (between parentheses) temporal frequency of this flood days per CWT and Month.

We decided to work with larger regions than municipalities in order to observe the main spatial patterns across the Pyrenees. In the revised paragraph we have included new references to this figure and some little changes. See below the revised paragraph:

Figure 16 shows the 12 weather types (WT) obtained from the combination of mslp and z500, and explaining practically 80% of the variance, corresponding to the flood episodes that affected the Pyrenees between 1981 and 2015. First of all, it should be noted that there is no significant trend in any of the WTs. The WT 1-, characterised by a marked depression to the NW of the Iberian Peninsula and a thalweg, is the most characteristic of the episodes affecting the Eastern and Central Pyrenees (Fig. 17a) in autumn (Fig. 17b). This favours the advection of warm and humid air from the Mediterranean in low levels, and feeds humidity from remote sources. This was the case during the November 1982 episode (Llasat, 1987), and is the case in a large number of the episodes of intense rainfall that take place in the Western Mediterranean (Insua-Costa et al., 2022; Miró et al., 2022). Note in Figure 17b that this type of weather shows its maximum frequency in the month of October, the month with the most episodes of flooding in the Pyrenees.

The WT 3+ shows the formation of a mesoscale depression off the coast of Catalonia that results in instability and the E-SE air flow over the Eastern Pyrenees (Fig. 17a). The highest frequency is recorded in spring, specifically in June, a month that, as we have already seen, comes after October in terms of flood frequency (Fig. 17b). An example of this would be the floods of June 2014. These northern movements are usually associated with summer floods and can affect any area in the Pyrenees. The WT 1+ favours the entry of Atlantic air over the Western Pyrenees and, like the WT 1-, can lead to the passage of highly organised disturbances typical of winter or autumn (Fig. 17b), with notable rainfall accumulations in the western half of the Pyrenees (Lemus-Canovas et al., 2019b) where most of the floods are recorded (Fig. 17a). In fact, the highest frequency is recorded in January (Fig. 17b). On the other hand, the dominant weather type in summer is WT 2- (Fig. 17b), which shows in the slight wave over the Iberian Peninsula, while on the surface the situation relatively unclear. It would therefore be a situation favourable to isolated convection or poorly organised weather systems, typical of that time of year, but which can also result in some episodes of very intense rainfall, as also described in Lemus-Canovas et al. (2021). This is the situation that characterised the episode of Biescas (Aragon), which occurred on 7 August 1996, and the floods that affected the Basque Country and Aquitaine in August 1983, mainly concentrated in the southern half of the Pyrenees (Fig. 17a). Finally, it can be observed that in November the WT 4+ and WT 5+ dominate, both with a very marked groove over the Iberian Peninsula that will favour the vorticity to the east and the contribution of air flow from the Atlantic that feeds intense rainfall, especially in the easternmost sector of the mountain range (Lemus-Canovas et al., 2018). An example is the episode of November 2005, which had a serious impact on Catalonia.



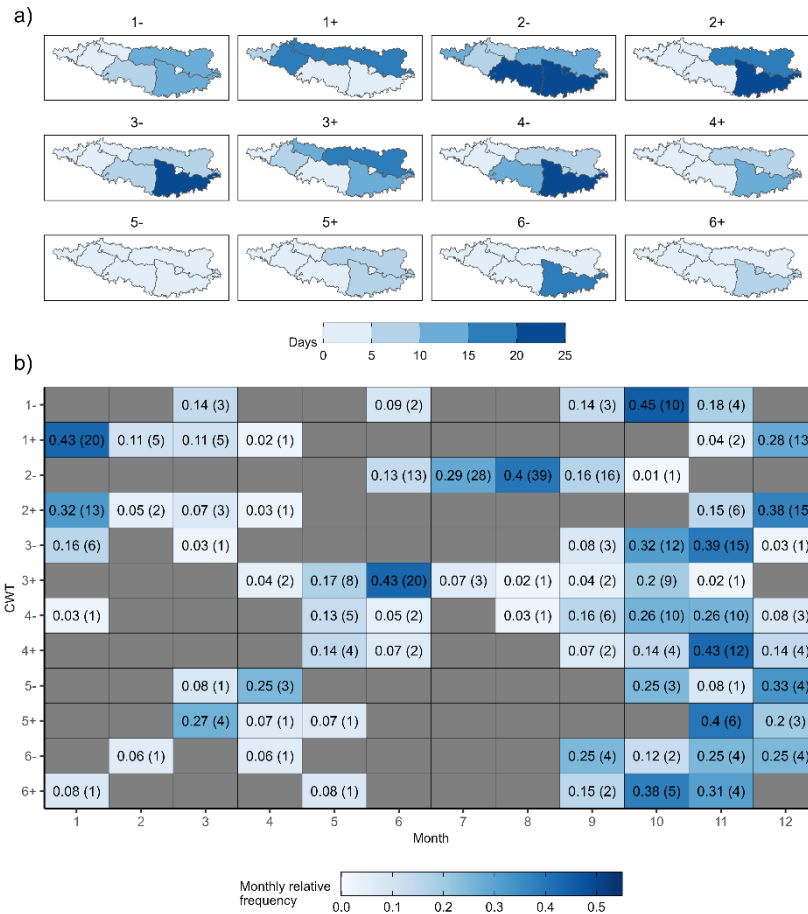

Figure 17. a) Number of flood days by weather type (WT) and Pyrenean region. b) Monthly relative frequencies of flood days by weather type and month. Between parenthesis absolute values are shown in flood days per month.

I.405-409 Again here the possible links with the limits of the flood inventory are not mentioned.

This paragraph of the Discussion has been modified. Thank you very much for your comment.

I.444 It is mentioned in table 2 and section 5 that both trends for the entire Pyrenean are not significant at 90%. This is in contradiction with what is stated here (conclusion).

We have addressed the identified discrepancy and have removed the two references to the 90% significance level. This removal aims to increase clarity and consistency across the discussion of regional and variable-specific trends, as mentions of this significance level did not contribute additional insights and were not uniformly applied to all the regions and variables throughout the manuscript.

Besides all the changes we have already introduced another important change. Following the proposal of referee 1, Appendix 1 has been eliminated and the information that it contained has been synthesized in two tables that have been introduced in section 3. Both tables are the following:

Table 2. Information and criteria used to fill out the EVENTS table.

|                                                    |                                                                                                                                                                                                                                                                                                                                           |
|----------------------------------------------------|-------------------------------------------------------------------------------------------------------------------------------------------------------------------------------------------------------------------------------------------------------------------------------------------------------------------------------------------|
| <b>Event codes</b>                                 | <b>Integrated Event Code:</b> numerical code used to identify the event that have affected one or more regions. Indicates the first and last day on which the event has been registered in the entire Pyrenean region.                                                                                                                    |
|                                                    | <b>Event:</b> Numeric field composed of the start and end dates of the event in the specific region                                                                                                                                                                                                                                       |
| <b>Dates</b>                                       | <b>Start date:</b> Indicates the beginning of the episode in the specific region.                                                                                                                                                                                                                                                         |
|                                                    | <b>End date:</b> Indicates the end of the episode in the specific region.<br>Criteria:<br>-The event starts when the rain starts in the region.<br>-The event ends when the flood ends.<br>-A subsequent episode is considered a new episode when there is more than one day (at least) without any of the previous conditions occurring. |
| <b>Location information</b>                        | <b>Region:</b> Indicates the administrative region affected by the event: Aragon (AR), Catalonia (CAT), Navarre (NA), Basque Country (PV); Occitanie (OC), Nouvelle-Aquitaine (AQ), Andorra (AND)                                                                                                                                         |
|                                                    | <b>Location 1:</b> List of affected counties in the specific region                                                                                                                                                                                                                                                                       |
|                                                    | <b>Location 2:</b> List of affected municipalities in the specific region                                                                                                                                                                                                                                                                 |
|                                                    | <b>Number of municipalities affected:</b> number of municipalities that suffered damages in the specific region                                                                                                                                                                                                                           |
| <b>Meteorological and hydrological information</b> | <b>Ptotal (Loc), Pmax (24 h) (Loc) o P (h) (Loc) (mm):</b> It indicates the maximum cumulated precipitation in all the event or/and the maximum precipitation in 24h in mm or/and the maximum rainfall intensity in mm/h and its duration. In the three cases the station where the value was recorded is indicated.                      |
|                                                    | <b>Other meteorological data:</b> Optional field to add more hydrometeorological information.                                                                                                                                                                                                                                             |
|                                                    | <b>Other weather phenomena:</b> Other adverse natural phenomena occurred in addition to floods: landslide, debris flow, hail, snow, windstorm, tornado, snow melting, lightning.                                                                                                                                                          |
|                                                    | <b>Affected drainage basins:</b> List of affected river basins                                                                                                                                                                                                                                                                            |
|                                                    | <b>Maximum flow (m<sup>3</sup>/s):</b> Maximum instantaneous flow recorded indicating the river, gauging station and date, in addition to the average annual flow. If information is available for more than one river, it is included.                                                                                                   |
| <b>Event impact indicators</b>                     | <b>Category:</b> The category of the flood event in the region according to the criteria described in section 3.1. There is a column for each category and supplementary categories                                                                                                                                                       |

Table 3. Information and criteria used to fill out the MUNICIPALITIES table.

|                                               |                                                                                                                                                                                                                        |
|-----------------------------------------------|------------------------------------------------------------------------------------------------------------------------------------------------------------------------------------------------------------------------|
| <b>Event codes</b>                            | <b>Integrated Event Code:</b> numerical code used to identify the event that have affected one or more regions. Indicates the first and last day on which the event has been registered in the entire Pyrenean region. |
|                                               | <b>Event:</b> Numeric field composed of the start and end dates of the event in the specific region. The same code that identifies the event in the “Events” table must be used.                                       |
| <b>Category</b>                               | <b>Event category:</b> The category of the flood event in the region according to the criteria described in section 3.1. There is a column for each category..                                                         |
| <b>Municipality and region identification</b> | <b>MunicipalityID:</b> Code (NATCODE, INSEE or equivalent) of the municipality affected by the floods. Each row is for a municipality, which means an event can have more than one row.                                |
|                                               | <b>Location name:</b> Name of the municipality.                                                                                                                                                                        |
|                                               | <b>Region:</b> region to which the municipality belongs                                                                                                                                                                |
| <b>Information about victims</b>              | <b>Deceased:</b> Total number of fatalities in the municipality (if any).                                                                                                                                              |
|                                               | <b>Gender and age of victims:</b> When information is available, the gender and age of each victim is indicated.                                                                                                       |
|                                               | <b>Causes:</b> A brief description of the causes of death.                                                                                                                                                             |

**Other information****Other information:** Supplementary information that is not covered in the other fields.**New References**

Amblar-Francés, M.P., Ramos-Calzado, P., Sanchis-Lladó, J., Hernanz-Lázaro, A., Peral-García, M.C., Navascués, B., Dominguez-Alonso, M., Pastor-Saavedra, M.A., Rodríguez-Camino, E.: High resolution climate change projections for the Pyrenees region. *Advances in Science and Research* 17, 191-208. <https://doi.org/10.5194/asr-17-191-2020>, 2020

Beguiría S. (coord.): Caracterización de los recursos hídricos de los Pirineos en la actualidad, y escenarios futuros. Memorias científicas del proyecto PIRAGUA, vol. 1. Estación Experimental de Aula Dei, Consejo Superior de Investigaciones Científicas (EEADCSIC), Zaragoza, España, 124. DOI: <https://doi.org/10.20350/digitalCSIC/14683.2023a>

Beguiría S. (ed.): Adaptación al cambio climático en la gestión de los recursos hídricos de los Pirineos. Memorias científicas del proyecto PIRAGUA, vol. 2. Estación Experimental de Aula Dei, Consejo Superior de Investigaciones Científicas (EEADCSIC), Zaragoza, España (220pp.). DOI: <https://doi.org/10.20350/digitalCSIC/14684>, 2023b.

Beniston, M.: Climatic change in mountain regions: a review of possible impacts. *Climatic change*, 59(1), 5-31, <https://doi.org/10.1023/A:1024458411589>, 2003

Beniston, M., and Stoffel, M.: Assessing the impacts of climatic change on mountain water resources. *Science of the Total Environment*, 493, 1129-1137. <https://doi.org/10.1016/j.scitotenv.2013.11.122>, 2014

Boudou, M., Lang, M., Vinet, F., & Cœur, D. : Comparative hazard analysis of processes leading to remarkable flash floods (France, 1930–1999). *Journal of Hydrology*, 541, 533–552. <https://doi.org/10.1016/j.jhydrol.2016.05.032>, 2016.

Braud, I., Roux, H., Anquetin, S., Maubourguet, M.M., Manus, C., Viallet, P., Dartus, D. : The use of distributed hydrological models for the Gard 2002 flash flood event: analysis of associated hydrological processes. *J. Hydrol.* 394 (1–2), 162–181, 2010.

García Ruiz, J.M., White, S.M., Martí, C., Valero, B., Errea, M.P., Gómez Villar, A.: La catástrofe del barranco de arás (biescas, pirineo aragonés) y su contexto espacio-temporal, IPE-CSIC, Zaragoza, España, ISBN. 84-921 842-1-3, 1996.

Gil-Guirado, S., Pérez-Morales, A., and Lopez-Martinez, F.: SMC-Flood database: a high-resolution press database on flood cases for the Spanish Mediterranean coast (1960–2015), *Nat. Hazards Earth Syst. Sci.*, 19, 1955–1971, <https://doi.org/10.5194/nhess-19-1955-2019>, 2019.

IPCC, 2022: Climate Change 2022: Impacts, Adaptation, and Vulnerability. Contribution of Working Group II to the Sixth Assessment Report of the Intergovernmental Panel on Climate Change [H.-O. Pörtner, D.C. Roberts, M. Tignor, E.S. Poloczanska, K. Mintenbeck, A. Alegría, M. Craig, S. Langsdorf, S. Löschke, V. Möller, A. Okem, B. Rama (eds.)]. Cambridge University Press. Cambridge University Press, Cambridge, UK and New York, NY, USA, 3056 pp., doi:10.1017/9781009325844.

Llasat, M.C., 2009. Chapter 18: Storms and floods. In *The Physical Geography of the Mediterranean basin*. Edited by Jamie Woodward. Published by Oxford University Press, ISBN: 978-0-19-926803-0, pp. 504-531

Llasat, M. C., M. Llasat-Botija, O. Petrucci, A.A. Pasqua, J. Rosselló, F.Vinet, L. Boissier: Floods in the North-Western Mediterranean Region : presentation of the HYMEX database and comparison with pre-existing global databases. *La Houille Blanche*, January 2013, 1, 5-9, DOI 10.1051/lhb/2013001, 2013a.

Llasat, M. C., Llasat-Botija, M., Petrucci, O., Pasqua, A. A., Rosselló, J., Vinet, F., and Boissier, L.: Towards a database on societal impact of Mediterranean floods within the framework of the HYMEX project, *Nat. Hazards Earth Syst. Sci.*, 13, 1337–1350, <https://doi.org/10.5194/nhess-13-1337-2013>, 2013b.

Papagiannaki, K., Lagouvardos, K., and Kotroni, V.: A database of high-impact weather events in Greece: a descriptive impact analysis for the period 2001–2011, *Nat. Hazards Earth Syst. Sci.*, 13, 727–736, <https://doi.org/10.5194/nhess-13-727-2013>, 2013.

Petrucci, O.: Brief communication "The assessment of damage caused by historical landslide events", *Nat. Hazards Earth Syst. Sci.*, 13, 755–761, <https://doi.org/10.5194/nhess-13-755-2013>, 2013.

Steiger, R., Knowles, N., Pöll, K., & Rutt, M.: Impacts of climate change on mountain tourism: A review. *Journal of Sustainable Tourism*, 1-34, <https://doi.org/10.1080/09669582.2022.2112204>, 2022.

Trapero, L., J. Bech, F. Duffourg, P. Esteban and J. Lorente: Mesoscale numerical analysis of the historical November 1982 heavy precipitation event over Andorra (Eastern Pyrenees), *Nat. Hazards Earth Syst. Sci.*, 13, 2969-2990, 2013.

Vinet, F., V. Bigot, O. Petrucci, K. Papagiannaki, M.C. Llasat, V. Kotroni, L. Boissier, L. Aceto, M. Grimalt, M. Llasat-Botija, A.A. Pasqua, J. Rossello, Ö.Kılıç, A. Kahraman, and Y. Tramblay: Mapping flood-related mortality in the mediterranean basin. Results from the MEFF v2.0 DB. *Water (Switzerland)*, 11(10). <https://doi.org/10.3390/w11102196>, 2016.

Wirtz, A., Kron, W., Löw, P., and Steuer, M.: The need for data: Natural disasters and the challenges of database management. *Natural Hazards*, 70(1), 135–157. <https://doi.org/10.1007/s11069-012-0312-4>, 2014.

Zêzere, J. L., Pereira, S., Tavares, A., Bateira, C., Trigo, R., Quaresma, I., Santos, P., Santos, M. and Verde, J.: - DISASTER: a GIS database on hydro-geomorphologic disasters in Portugal. *Natural Hazards*, 71: 1029-1050. DOI 10.1007/s11069-013-1018-y, 2014.

Zimmermann, M. and M. Keiler, 2015: International frameworks for disaster risk reduction: useful guidance for sustainable mountain development? *Mt. Res. Dev.* , 35 (2), 195–202, doi:10.1659/MRD-JOURNAL-D-15-00006.1.
